# Supplementary material for: Surprising Prokaryotic and Eukaryotic Diversity, Community Structure and Biogeography of Ethiopian Soda Lakes
Source: PLoS One. 2013 Aug 30;8(8):e72577. doi: 10.1371/journal.pone.0072577 (PMC3758324; doi:10.1371/journal.pone.0072577)
Supplement: Table S4 — UniRef90 protein clusters. Accession, name and length of representative protein sequence for UniRef with number of putative mRNA reads sharing best alignments to each cluster, mean read length and coverage (total read length/protein sequence length in bp). Only clusters >2 mRNA reads and aligning with a bitscore >45 included. (XLSX) [file pone.0072577.s011.xlsx]

## Sheet: Arenguadi
Accession	Name	Length	Hits	Mean read length (bp)	Coverage
Q25BV4	Methane monooxygenase protein C n=2 Tax=Methylomicrobium RepID=Q25BV4_9GAMM	250	14	499.571	9.32533
Q4G3F2	Photosystem Q(B) protein n=10 Tax=Eukaryota RepID=PSBA_EMIHU	360	11	441.364	4.49537
E6PDN8	Putative uncharacterized protein n=1 Tax=mine drainage metagenome RepID=E6PDN8_9ZZZZ	227	11	363.818	5.87665
G4DXN4	Transposase IS605 OrfB n=1 Tax=Thiocystis violascens DSM 198 RepID=G4DXN4_9GAMM	462	11	459.909	3.65007
A0L9Q4	Hemolysin-type calcium-binding region n=1 Tax=Magnetococcus sp. MC-1 RepID=A0L9Q4_MAGSM	15245	10	430.4	0.0941074
B6G1S6	Putative uncharacterized protein n=1 Tax=Clostridium hiranonis DSM 13275 RepID=B6G1S6_9FIRM	169	9	397.556	7.0572
UPI0001CE18D6	UPI0001CE18D6 related cluster n=1 Tax=unknown RepID=UPI0001CE18D6	488	8	436.125	2.3832
D5GZ88	Conserved protein n=1 Tax=Lactobacillus crispatus ST1 RepID=D5GZ88_LACCS	156	8	356.125	6.08761
A1VSY1	Putative uncharacterized protein n=1 Tax=Polaromonas naphthalenivorans CJ2 RepID=A1VSY1_POLNA	455	8	417.125	2.44469
Q25BV2	Methane monooxygenase protein B n=2 Tax=Methylomicrobium RepID=Q25BV2_9GAMM	414	7	490.286	2.76329
G4DL03	Chaperone protein DnaK n=1 Tax=Thioalkalivibrio thiocyanoxidans ARh 4 RepID=G4DL03_9GAMM	639	7	448.429	1.63745
G4DDH0	RNA-directed DNA polymerase (Reverse transcriptase) n=1 Tax=Thioalkalivibrio thiocyanoxidans ARh 4 RepID=G4DDH0_9GAMM	420	7	417	2.31667
C1HUN6	Putative uncharacterized protein n=1 Tax=Escherichia sp. 3_2_53FAA RepID=C1HUN6_9ESCH	66	7	323.571	11.4394
A5ZYK8	Putative uncharacterized protein n=1 Tax=Ruminococcus obeum ATCC 29174 RepID=A5ZYK8_9FIRM	108	6	452.5	8.37963
E9C2H1	Pectoralis alpha actinin n=1 Tax=Capsaspora owczarzaki ATCC 30864 RepID=E9C2H1_CAPO3	900	5	465.4	0.861852
Q3BKI1	Putative uncharacterized protein n=1 Tax=Magnetospirillum gryphiswaldense RepID=Q3BKI1_9PROT	259	5	283	1.82111
G4DJG0	Formate dehydrogenase, alpha subunit n=1 Tax=Thioalkalivibrio thiocyanoxidans ARh 4 RepID=G4DJG0_9GAMM	805	5	395	0.817805
H1G2H0	Putative uncharacterized protein n=1 Tax=Ectothiorhodospira sp. PHS-1 RepID=H1G2H0_9GAMM	289	5	485	2.797
A0T0G9	Photosystem Q(B) protein n=362 Tax=Eukaryota RepID=PSBA_PHATC	360	5	397.4	1.83981
E1RDD3	Putative uncharacterized protein n=1 Tax=Methanoplanus petrolearius DSM 11571 RepID=E1RDD3_METP4	167	5	429.8	4.28942
Q9WJ23	RNA-dependent RNA polymerase, putative n=1 Tax=Ophiostoma mitovirus 5 RepID=Q9WJ23_9VIRU	729	5	397	0.907636
E6VWH2	Glycosyl transferase group 1 n=1 Tax=Desulfovibrio aespoeensis Aspo-2 RepID=E6VWH2_DESAO	386	5	308	1.32988
C0QQH8	Putative uncharacterized protein n=2 Tax=Persephonella marina EX-H1 RepID=C0QQH8_PERMH	159	5	368.2	3.85954
G7EA20	Putative uncharacterized protein Mo06383 n=1 Tax=Mixia osmundae IAM 14324 RepID=G7EA20_MIXOS	131	5	292.4	3.7201
Q44550	Photosystem I P700 chlorophyll a apoprotein A1 n=9 Tax=Cyanobacteria RepID=PSAA_ANAVT	752	5	371	0.822252
D5BS37	Flagellin FliC n=1 Tax=Candidatus Puniceispirillum marinum IMCC1322 RepID=D5BS37_PUNMI	812	5	444	0.91133
B4D5T5	Phosphotransferase system, phosphocarrier protein HPr n=1 Tax=Chthoniobacter flavus Ellin428 RepID=B4D5T5_9BACT	102	4	478.75	6.25817
UPI00006CBEC9	UPI00006CBEC9 related cluster n=1 Tax=unknown RepID=UPI00006CBEC9	2495	4	322.75	0.172478
E7S078	CobW/P47K family protein n=1 Tax=Lautropia mirabilis ATCC 51599 RepID=E7S078_9BURK	324	4	292.75	1.20473
Q7UJ30	Flagellar P-ring protein n=2 Tax=Rhodopirellula baltica RepID=Q7UJ30_RHOBA	379	4	352.25	1.23923
G4DJF9	Formate dehydrogenase, beta subunit n=1 Tax=Thioalkalivibrio thiocyanoxidans ARh 4 RepID=G4DJF9_9GAMM	302	4	302	1.33333
G4DL48	FAD linked oxidase domain protein n=1 Tax=Thioalkalivibrio thiocyanoxidans ARh 4 RepID=G4DL48_9GAMM	1280	4	517.75	0.539323
B0A7G6	Putative uncharacterized protein n=1 Tax=Clostridium bartlettii DSM 16795 RepID=B0A7G6_9FIRM	85	4	264.5	4.14902
Q08051	Ribulose bisphosphate carboxylase large chain n=26 Tax=Haptophyceae RepID=RBL_PLECA	488	4	438.75	1.19877
E6QDG6	Putative uncharacterized protein n=2 Tax=mine drainage metagenome RepID=E6QDG6_9ZZZZ	753	4	383.25	0.678619
F9UGT2	Peptidase U62 modulator of DNA gyrase n=1 Tax=Thiocapsa marina 5811 RepID=F9UGT2_9GAMM	480	4	472	1.31111
G4DDL9	Putative ammonium transporter, marine subtype n=1 Tax=Thioalkalivibrio thiocyanoxidans ARh 4 RepID=G4DDL9_9GAMM	425	4	442.5	1.38824
F0Y6B3	Putative uncharacterized protein RPPK3 n=1 Tax=Aureococcus anophagefferens RepID=F0Y6B3_AURAN	330	4	286.5	1.15758
A7BTA9	ABC transporter ATP-binding protein n=1 Tax=Beggiatoa sp. PS RepID=A7BTA9_9GAMM	545	4	511.25	1.25076
Q1YV60	Putative polar flagellar protein FlaK n=1 Tax=gamma proteobacterium HTCC2207 RepID=Q1YV60_9GAMM	368	4	385	1.39493
D7K5P4	Putative uncharacterized protein n=1 Tax=Bacteroides sp. 3_1_23 RepID=D7K5P4_9BACE	52	4	265.25	6.80128
A9T5C8	Predicted protein n=1 Tax=Physcomitrella patens subsp. patens RepID=A9T5C8_PHYPA	392	4	509.75	1.73384
E0XV41	Putative uncharacterized protein n=1 Tax=uncultured Chromatiales bacterium HF0200_41F04 RepID=E0XV41_9GAMM	89	4	226	3.38577
Q09125	Ribulose bisphosphate carboxylase small chain n=2 Tax=Porphyridium aerugineum RepID=RBS_PORAE	138	4	487.5	4.71014
G4DKV6	Putative uncharacterized protein n=1 Tax=Thioalkalivibrio thiocyanoxidans ARh 4 RepID=G4DKV6_9GAMM	482	4	544.5	1.50622
Q3ASY8	Parallel beta-helix repeat n=1 Tax=Chlorobium chlorochromatii CaD3 RepID=Q3ASY8_CHLCH	36805	4	480.5	0.0174071
Q5NYT6	Adenine specific methylase, HemK family n=1 Tax=Aromatoleum aromaticum EbN1 RepID=Q5NYT6_AROAE	311	4	574	2.46088
D0ST72	Putative uncharacterized protein n=1 Tax=Acinetobacter lwoffii SH145 RepID=D0ST72_ACILW	386	3	518	1.34197
B1N6J7	Putative uncharacterized protein n=1 Tax=uncultured beta proteobacterium CBNPD1 BAC clone 578 RepID=B1N6J7_9PROT	114	3	383.333	3.36257
Q9TAH9	ATP synthase subunit alpha n=1 Tax=Cafeteria roenbergensis RepID=Q9TAH9_CAFRO	601	3	484.667	0.806434
G4CPP3	dTDP-4-dehydrorhamnose 3,5-epimerase n=1 Tax=Neisseria wadsworthii 9715 RepID=G4CPP3_9NEIS	185	3	434	2.34595
A5ZQM1	Putative uncharacterized protein n=2 Tax=Ruminococcus obeum ATCC 29174 RepID=A5ZQM1_9FIRM	199	3	517.333	2.59966
Q6FAT8	2-dehydro-3-deoxyphosphooctonate aldolase n=33 Tax=Acinetobacter RepID=KDSA_ACIAD	285	3	513	1.8
H8KRZ8	TonB-linked outer membrane protein, SusC/RagA family n=1 Tax=Solitalea canadensis DSM 3403 RepID=H8KRZ8_FLECA	1098	3	489.667	0.445962
A0LV51	Ribosome-recycling factor n=1 Tax=Acidothermus cellulolyticus 11B RepID=RRF_ACIC1	185	3	478	2.58378
D0LRL6	Putative uncharacterized protein n=1 Tax=Haliangium ochraceum DSM 14365 RepID=D0LRL6_HALO1	666	3	529	0.794294
D3FAG6	ATP-dependent chaperone ClpB n=1 Tax=Conexibacter woesei DSM 14684 RepID=D3FAG6_CONWI	855	3	264	0.308772
D1N7H1	Putative uncharacterized protein n=1 Tax=Victivallis vadensis ATCC BAA-548 RepID=D1N7H1_9BACT	784	3	490.667	0.62585
G4E7K4	Transposase IS4 family protein n=1 Tax=Thiorhodospira sibirica ATCC 700588 RepID=G4E7K4_9GAMM	416	3	483	1.16106
A3HXH7	Putative outer membrane protein n=1 Tax=Algoriphagus sp. PR1 RepID=A3HXH7_9BACT	544	3	612	1.125
B0TIE7	Putative uncharacterized protein n=1 Tax=Heliobacterium modesticaldum Ice1 RepID=B0TIE7_HELMI	147	3	303	2.06122
C0BG34	Lipoprotein n=1 Tax=Flavobacteria bacterium MS024-2A RepID=C0BG34_9BACT	1171	3	297	0.253629
G4DKX2	NADH-quinone oxidoreductase, chain G n=1 Tax=Thioalkalivibrio thiocyanoxidans ARh 4 RepID=G4DKX2_9GAMM	793	3	410.667	0.517865
G4DGD2	Transmembrane proetin, twin-arginine translocation pathway signal n=1 Tax=Thioalkalivibrio thiocyanoxidans ARh 4 RepID=G4DGD2_9GAMM	156	3	384.667	2.46581
G0QZC2	Snf2 family n-terminal domain protein n=1 Tax=Ichthyophthirius multifiliis strain G5 RepID=G0QZC2_ICHMG	632	3	316.333	0.500527
D0SX37	Putative uncharacterized protein n=1 Tax=Acinetobacter lwoffii SH145 RepID=D0SX37_ACILW	724	3	259.667	0.358656
Q27HU3	Particulate methane monooxygenase alpha subunit (Fragment) n=3 Tax=Methylococcaceae RepID=Q27HU3_9GAMM	141	3	407	2.88652
G4DF82	Flavocytochrome c sulfide dehydrogenase flavin-binding n=1 Tax=Thioalkalivibrio thiocyanoxidans ARh 4 RepID=G4DF82_9GAMM	432	3	538	1.24537
D0SSB6	O-methyltransferase n=1 Tax=Acinetobacter lwoffii SH145 RepID=D0SSB6_ACILW	287	3	370	1.2892
Q5P4P8	tRNA and rRNA cytosine-C5-methylases sun n=1 Tax=Aromatoleum aromaticum EbN1 RepID=Q5P4P8_AROAE	447	3	380.667	0.851603
H3GMM3	Uncharacterized protein n=1 Tax=Phytophthora ramorum RepID=H3GMM3_PHYRM	1728	3	352.333	0.203897
Q1YV57	Putative uncharacterized protein n=1 Tax=gamma proteobacterium HTCC2207 RepID=Q1YV57_9GAMM	138	3	426.333	3.08937
G8QK83	Coenzyme F390 synthetase n=1 Tax=Dechlorosoma suillum PS RepID=G8QK83_9RHOO	410	3	165	0.402439
G4DHG4	HAD-superfamily hydrolase, subfamily IA, variant 3 n=1 Tax=Thioalkalivibrio thiocyanoxidans ARh 4 RepID=G4DHG4_9GAMM	246	3	440.667	1.79133
B3RG63	Photosystem I 700 apoprotein A1 (Fragment) n=1 Tax=Hildenbrandia rubra RepID=B3RG63_9FLOR	509	3	498	0.978389
C7N4D2	Diaminohydroxyphosphoribosylaminopyrimidine deaminase /5-amino-6-(5-phosphoribosylamino)uracil reductase n=1 Tax=Slackia heliotrinireducens DSM 20476 RepID=C7N4D2_SLAHD	371	3	478	1.28841
G4DE58	Putative uncharacterized protein n=1 Tax=Thioalkalivibrio thiocyanoxidans ARh 4 RepID=G4DE58_9GAMM	152	3	430	2.82895
F4PBY4	Putative uncharacterized protein n=1 Tax=Batrachochytrium dendrobatidis JAM81 RepID=F4PBY4_BATDJ	564	3	282	0.5
D5QNA3	Putative uncharacterized protein n=1 Tax=Methylosinus trichosporium OB3b RepID=D5QNA3_METTR	714	3	414.667	0.580766
G4DEK9	Cytochrome c1 n=1 Tax=Thioalkalivibrio thiocyanoxidans ARh 4 RepID=G4DEK9_9GAMM	246	3	511	2.07724
G4DF91	Quinolinate synthetase complex, A subunit n=1 Tax=Thioalkalivibrio thiocyanoxidans ARh 4 RepID=G4DF91_9GAMM	353	3	460	1.30312
UPI000223F305	UPI000223F305 related cluster n=1 Tax=unknown RepID=UPI000223F305	253	3	652.333	2.57839
A0CT98	Chromosome undetermined scaffold_27, whole genome shotgun sequence n=1 Tax=Paramecium tetraurelia RepID=A0CT98_PARTE	2200	3	434	0.197273
O76506	Ciliary outer arm dynein beta heavy chain n=2 Tax=Tetrahymena thermophila RepID=O76506_TETTH	4589	3	454	0.0989322
A3RDZ6	Terminase n=7 Tax=unclassified Siphoviridae RepID=A3RDZ6_9CAUD	423	3	482.333	1.14027
H6X3M7	Putative uncharacterized protein n=1 Tax=Enterobacteria phage vB_KleM-RaK2 RepID=H6X3M7_9CAUD	3326	3	430.333	0.129385
G4DHS1	DNA mismatch repair protein MutS n=1 Tax=Thioalkalivibrio thiocyanoxidans ARh 4 RepID=G4DHS1_9GAMM	860	3	502	0.583721
A5N867	Glutamate--tRNA ligase n=2 Tax=Clostridium kluyveri RepID=SYE_CLOK5	487	3	316.667	0.65024
Q1YV90	Putative uncharacterized protein n=1 Tax=gamma proteobacterium HTCC2207 RepID=Q1YV90_9GAMM	98	3	426	4.34694
Q8MA95	Ribulose bisphosphate carboxylase large chain (Fragment) n=1 Tax=Pavlova lutheri RepID=Q8MA95_PAVLU	343	3	490.667	1.43052
Q8MAG2	Photosystem I P700 chlorophyll A apoprotein A1 (Fragment) n=2 Tax=Pavlova RepID=Q8MAG2_9EUKA	465	3	332.667	0.715412
G0JP17	RNA-directed DNA polymerase (Reverse transcriptase) n=1 Tax=Acidithiobacillus ferrivorans SS3 RepID=G0JP17_9GAMM	441	3	524.667	1.18972
F5RBG7	Twin-arginine translocation pathway signal n=1 Tax=Methyloversatilis universalis FAM5 RepID=F5RBG7_9RHOO	453	3	274	0.604857
G4DGN3	Membrane protein insertase YidC n=1 Tax=Thioalkalivibrio thiocyanoxidans ARh 4 RepID=G4DGN3_9GAMM	559	3	480	0.858676
G4DI04	Cytochrome c family protein n=1 Tax=Thioalkalivibrio thiocyanoxidans ARh 4 RepID=G4DI04_9GAMM	497	3	526.667	1.05969
P93099	60S ribosomal protein L13a n=1 Tax=Cyanophora paradoxa RepID=RL13A_CYAPA	200	3	574.667	2.87333
C3XEG3	Putative uncharacterized protein (Fragment) n=1 Tax=Helicobacter bilis ATCC 43879 RepID=C3XEG3_9HELI	96	3	383.667	3.99653
H3IEA1	Uncharacterized protein n=4 Tax=Strongylocentrotus purpuratus RepID=H3IEA1_STRPU	1170	3	350	0.299145
C1N514	Flagellar outer dynein arm heavy chain beta n=1 Tax=Micromonas pusilla CCMP1545 RepID=C1N514_MICPC	4518	3	323.667	0.0716394
Q2NJ05	Putative uncharacterized protein n=2 Tax=Candidatus Phytoplasma asteris RepID=Q2NJ05_AYWBP	213	3	270.333	1.26917
C4KDH9	Extracellular solute-binding protein family 5 n=1 Tax=Thauera sp. MZ1T RepID=C4KDH9_THASP	531	3	521	0.981168
C8PWI3	Ribonucleoside-diphosphate reductase, beta subunit n=1 Tax=Enhydrobacter aerosaccus SK60 RepID=C8PWI3_9GAMM	377	3	441	1.16976
A3W546	5-oxoprolinase n=2 Tax=Roseovarius RepID=A3W546_9RHOB	1209	3	511.333	0.422939
D4PZP5	Putative uncharacterized protein n=1 Tax=Listeria monocytogenes J2818 RepID=D4PZP5_LISMN	110	3	217	1.97273
F5B3R4	Major capsid protein n=1 Tax=Synechococcus phage S-CRM01 RepID=F5B3R4_9CAUD	469	2	382.5	0.54371
F4PEN2	Putative uncharacterized protein n=1 Tax=Batrachochytrium dendrobatidis JAM81 RepID=F4PEN2_BATDJ	518	2	511	0.657658
Q1N2Y3	Flagellin and related hook-associated protein n=1 Tax=Bermanella marisrubri RepID=Q1N2Y3_9GAMM	1020	2	540	0.352941
G4SX53	Putative uncharacterized protein n=1 Tax=Methylomicrobium alcaliphilum 20Z RepID=G4SX53_META2	837	2	427.5	0.340502
C7T760	Conserved protein n=5 Tax=Lactobacillus RepID=C7T760_LACRG	131	2	234.5	1.19338
H8ZMI9	Virion structural protein n=1 Tax=Synechococcus phage S-MbCM6 RepID=H8ZMI9_9CAUD	2625	2	280	0.0711111
B8MKS1	Glutamate synthase Glt1, putative n=2 Tax=Trichocomaceae RepID=B8MKS1_TALSN	2125	2	472.5	0.148235
A3J5U5	Putative uncharacterized protein n=1 Tax=Flavobacteria bacterium BAL38 RepID=A3J5U5_9FLAO	347	2	434	0.833814
O78507	Photosystem I P700 chlorophyll a apoprotein A2 n=5 Tax=Pyrenomonadales RepID=PSAB_GUITH	734	2	341.5	0.310173
Q5P1A6	Probable transport system ATP-binding protein n=1 Tax=Aromatoleum aromaticum EbN1 RepID=Q5P1A6_AROAE	372	2	590.5	1.05824
G4DDU5	Putative uncharacterized protein n=1 Tax=Thioalkalivibrio thiocyanoxidans ARh 4 RepID=G4DDU5_9GAMM	616	2	306	0.331169
A3K5F4	Methylmalonate-semialdehyde dehydrogenase (Acylating) protein n=1 Tax=Sagittula stellata E-37 RepID=A3K5F4_9RHOB	524	2	516	0.656489
D8UAN9	Putative uncharacterized protein n=1 Tax=Volvox carteri RepID=D8UAN9_VOLCA	762	2	511	0.447069
P12466	Ribulose bisphosphate carboxylase large chain n=408 Tax=Viridiplantae RepID=RBL_CHLVU	475	2	383	0.537544
B9HZW7	Predicted protein n=1 Tax=Populus trichocarpa RepID=B9HZW7_POPTR	580	2	560.5	0.644253
F8X2W9	Putative uncharacterized protein n=1 Tax=Dysgonomonas mossii DSM 22836 RepID=F8X2W9_9PORP	1134	2	522	0.306878
A0E1S5	Chromosome undetermined scaffold_73, whole genome shotgun sequence n=1 Tax=Paramecium tetraurelia RepID=A0E1S5_PARTE	487	2	391	0.53525
P95521	Cytochrome b6-f complex iron-sulfur subunit (Fragment) n=1 Tax=Phormidium laminosum RepID=P95521_PHOLA	177	2	379.5	1.42938
E1Y3H9	Cell division protein ftsZ n=8 Tax=Legionella pneumophila RepID=E1Y3H9_LEGPN	398	2	255	0.427136
E9C7Y2	DSBA oxidoreductase n=1 Tax=Capsaspora owczarzaki ATCC 30864 RepID=E9C7Y2_CAPO3	449	2	353	0.524128
Q3SIC8	Heterodisulfide reductase, subunit A n=1 Tax=Thiobacillus denitrificans ATCC 25259 RepID=Q3SIC8_THIDA	752	2	356	0.315603
B2Y898	PmoA (Fragment) n=34 Tax=Bacteria RepID=B2Y898_9BACT	208	2	536.5	1.71955
B9XNQ1	Cysteinyl-tRNA synthetase n=1 Tax=Pedosphaera parvula Ellin514 RepID=B9XNQ1_9BACT	471	2	450.5	0.63765
G0R4F4	Putative uncharacterized protein n=1 Tax=Ichthyophthirius multifiliis strain G5 RepID=G0R4F4_ICHMG	227	2	334.5	0.982379
F0RTV9	Basic membrane lipoprotein n=1 Tax=Sphaerochaeta globus str. Buddy RepID=F0RTV9_SPHGB	364	2	521.5	0.955128
E1VJZ1	Type II secretion system protein F n=1 Tax=gamma proteobacterium HdN1 RepID=E1VJZ1_9GAMM	295	2	527	1.19096
F6PMP6	Uncharacterized protein (Fragment) n=2 Tax=Ornithorhynchus anatinus RepID=F6PMP6_ORNAN	482	2	604	0.835408
A2A098	Trypsin domain protein n=1 Tax=Microscilla marina ATCC 23134 RepID=A2A098_9BACT	619	2	350.5	0.377491
G4DFV2	Putative uncharacterized protein n=1 Tax=Thioalkalivibrio thiocyanoxidans ARh 4 RepID=G4DFV2_9GAMM	277	2	309	0.743682
Q94Z24	Orf568 n=1 Tax=Pylaiella littoralis RepID=Q94Z24_PYLLI	568	2	446	0.523474
Q3BKI0	Putative uncharacterized protein n=1 Tax=Magnetospirillum gryphiswaldense RepID=Q3BKI0_9PROT	150	2	388.5	1.72667
E7ABD3	Putative uncharacterized protein n=1 Tax=Helicobacter felis ATCC 49179 RepID=E7ABD3_HELFC	141	2	590.5	2.79196
H0J1L8	D-isomer specific 2-hydroxyacid dehydrogenase NAD-binding protein n=1 Tax=Halomonas sp. GFAJ-1 RepID=H0J1L8_9GAMM	333	2	384.5	0.76977
G4DFX9	Cation diffusion facilitator family transporter n=1 Tax=Thioalkalivibrio thiocyanoxidans ARh 4 RepID=G4DFX9_9GAMM	400	2	554.5	0.924167
E1R3U3	MATE efflux family protein n=1 Tax=Spirochaeta smaragdinae DSM 11293 RepID=E1R3U3_SPISS	452	2	312	0.460177
Q5P194	General secretory pathway protein E n=1 Tax=Aromatoleum aromaticum EbN1 RepID=Q5P194_AROAE	489	2	347.5	0.473756
D2XAK5	D6/D11-like helicase n=1 Tax=Marseillevirus RepID=D2XAK5_9VIRU	772	2	367	0.316926
E9CB51	Delta-24-sterol methyltransferase n=1 Tax=Capsaspora owczarzaki ATCC 30864 RepID=E9CB51_CAPO3	352	2	387	0.732955
H1NCV9	Amino acid ABC transporter substrate-binding protein, PAAT family n=1 Tax=Spirochaeta africana DSM 8902 RepID=H1NCV9_9SPIO	287	2	586.5	1.36237
C3ZYK5	Putative uncharacterized protein n=1 Tax=Branchiostoma floridae RepID=C3ZYK5_BRAFL	146	2	387	1.76712
G0QLE7	Putative uncharacterized protein n=1 Tax=Ichthyophthirius multifiliis strain G5 RepID=G0QLE7_ICHMG	935	2	443	0.315865
UPI00022C99FC	UPI00022C99FC related cluster n=3 Tax=unknown RepID=UPI00022C99FC	1150	2	340	0.197101
UPI000248C0F8	transcriptional regulator n=1 Tax=Paenibacillus elgii B69 RepID=UPI000248C0F8	148	2	231	1.04054
P38420	DNA-directed RNA polymerase II subunit RPB2 n=558 Tax=Embryophyta RepID=RPB2_ARATH	1188	2	503.5	0.282548
E0XU45	Putative uncharacterized protein n=1 Tax=uncultured Desulfobacterales bacterium HF0200_07G10 RepID=E0XU45_9DELT	127	2	255	1.33858
D5C171	Putative cytoplasmic protein n=1 Tax=Nitrosococcus halophilus Nc4 RepID=D5C171_NITHN	451	2	377	0.55728
C7RVF8	AAA ATPase n=1 Tax=Candidatus Accumulibacter phosphatis clade IIA str. UW-1 RepID=C7RVF8_ACCPU	281	2	489	1.16014
E3SL60	Tail sheath monomer n=1 Tax=Synechococcus phage S-SSM7 RepID=E3SL60_9CAUD	806	2	445	0.368073
D9RYS4	Lon protease n=1 Tax=Thermosediminibacter oceani DSM 16646 RepID=D9RYS4_THEOJ	796	2	523	0.438023
A0EIR3	Chromosome undetermined scaffold_99, whole genome shotgun sequence n=2 Tax=Paramecium tetraurelia RepID=A0EIR3_PARTE	2024	2	381	0.125494
A9C3J4	Putative uncharacterized protein n=1 Tax=Delftia acidovorans SPH-1 RepID=A9C3J4_DELAS	1609	2	528.5	0.218977
E0XUP3	Putative uncharacterized protein n=1 Tax=uncultured Verrucomicrobiales bacterium HF0200_39L05 RepID=E0XUP3_9BACT	76	2	179.5	1.57456
H8Z3T6	Putative uncharacterized protein n=1 Tax=Thiorhodovibrio sp. 970 RepID=H8Z3T6_9GAMM	317	2	491.5	1.03365
G4DL06	Probable inorganic polyphosphate/ATP-NAD kinase n=1 Tax=Thioalkalivibrio thiocyanoxidans ARh 4 RepID=G4DL06_9GAMM	292	2	350.5	0.800228
G4DMJ2	Putative transposase orf3 for insertion sequence element n=3 Tax=Thioalkalivibrio thiocyanoxidans ARh 4 RepID=G4DMJ2_9GAMM	558	2	385	0.459976
G4E3L5	Putative uncharacterized protein n=2 Tax=Thiorhodospira sibirica ATCC 700588 RepID=G4E3L5_9GAMM	326	2	583.5	1.19325
G4DF41	Iron--sulfur cluster insertion protein ErpA n=1 Tax=Thioalkalivibrio thiocyanoxidans ARh 4 RepID=G4DF41_9GAMM	124	2	411	2.20968
B4CV59	Putative uncharacterized protein n=1 Tax=Chthoniobacter flavus Ellin428 RepID=B4CV59_9BACT	418	2	482	0.76874
A2FBF4	Ankyrin repeat protein, putative n=1 Tax=Trichomonas vaginalis RepID=A2FBF4_TRIVA	688	2	585	0.56686
A9NHJ2	ABC-type transport system, substrat-binding component n=1 Tax=Acholeplasma laidlawii PG-8A RepID=A9NHJ2_ACHLI	793	2	401.5	0.337537
G4SWT7	Non-specific serine/threonine protein kinase n=1 Tax=Methylomicrobium alcaliphilum 20Z RepID=G4SWT7_META2	1412	2	304	0.143532
D8TSD4	Putative uncharacterized protein n=1 Tax=Volvox carteri RepID=D8TSD4_VOLCA	1799	2	590.5	0.218825
G0QKR4	Putative uncharacterized protein n=1 Tax=Ichthyophthirius multifiliis strain G5 RepID=G0QKR4_ICHMG	735	2	457	0.414512
O78508	Photosystem I P700 chlorophyll a apoprotein A1 n=7 Tax=Cryptophyta RepID=PSAA_GUITH	752	2	548	0.485816
G4DDI6	50S ribosomal protein L13 n=1 Tax=Thioalkalivibrio thiocyanoxidans ARh 4 RepID=G4DDI6_9GAMM	142	2	367	1.723
E8N1Z9	Putative uncharacterized protein n=1 Tax=Anaerolinea thermophila UNI-1 RepID=E8N1Z9_ANATU	681	2	350.5	0.343123
D8U8K4	Flagellar outer dynein arm heavy chain gamma n=1 Tax=Volvox carteri RepID=D8U8K4_VOLCA	4506	2	457	0.0676136
G1XJG0	Putative uncharacterized protein n=1 Tax=Arthrobotrys oligospora ATCC 24927 RepID=G1XJG0_ARTOA	1927	2	597.5	0.206712
D6SSV7	Transcriptional regulator, MucR family n=1 Tax=Desulfonatronospira thiodismutans ASO3-1 RepID=D6SSV7_9DELT	136	2	245	1.20098
D3SCP9	Leucine--tRNA ligase n=1 Tax=Thioalkalivibrio sp. K90mix RepID=D3SCP9_THISK	863	2	537	0.414832
F2UH72	Putative uncharacterized protein n=1 Tax=Salpingoeca sp. ATCC 50818 RepID=F2UH72_SALS5	862	2	582	0.450116
B2Y8A8	PmoA (Fragment) n=2 Tax=uncultured bacterium RepID=B2Y8A8_9BACT	208	2	540.5	1.73237
E1Z3A4	Putative uncharacterized protein n=1 Tax=Chlorella variabilis RepID=E1Z3A4_CHLVA	522	2	377	0.481481
B7J8Y6	Transposon, resolvase n=1 Tax=Acidithiobacillus ferrooxidans ATCC 23270 RepID=B7J8Y6_ACIF2	209	2	557	1.77671
G2E845	Putative transposase n=3 Tax=Chromatiaceae RepID=G2E845_9GAMM	331	2	441	0.888218
G4DIM6	Transcription-repair coupling factor n=1 Tax=Thioalkalivibrio thiocyanoxidans ARh 4 RepID=G4DIM6_9GAMM	1156	2	485.5	0.279988
A4BQ37	Putative uncharacterized protein n=1 Tax=Nitrococcus mobilis Nb-231 RepID=A4BQ37_9GAMM	606	2	493	0.542354
A1AII0	Putative uncharacterized protein n=1 Tax=Escherichia coli APEC O1 RepID=A1AII0_ECOK1	217	2	531.5	1.63287
H7E2P2	Fibronectin type III domain protein n=1 Tax=Desulfosporosinus acidiphilus SJ4 RepID=H7E2P2_9FIRM	1391	2	521	0.2497
G4DEG9	Pyruvate dehydrogenase E1 component n=1 Tax=Thioalkalivibrio thiocyanoxidans ARh 4 RepID=G4DEG9_9GAMM	887	2	334	0.251033
D3SCR3	30S ribosomal protein S11 n=2 Tax=Thioalkalivibrio RepID=D3SCR3_THISK	129	2	371	1.91731
UPI000214A974	UPI000214A974 related cluster n=1 Tax=unknown RepID=UPI000214A974	682	2	542.5	0.530303
D3SCR6	Preprotein translocase, SecY subunit n=2 Tax=Thioalkalivibrio RepID=D3SCR6_THISK	448	2	392	0.583333
D7W3H2	3-oxoacyl-[acyl-carrier-protein] reductase n=1 Tax=Chryseobacterium gleum ATCC 35910 RepID=D7W3H2_9FLAO	232	2	394	1.13218
G4DJE8	Binding-protein-dependent transport systems inner membrane component n=1 Tax=Thioalkalivibrio thiocyanoxidans ARh 4 RepID=G4DJE8_9GAMM	639	2	492.5	0.513824
G6FRG5	Cyanophycinase n=2 Tax=Cyanobacteria RepID=G6FRG5_9CYAN	287	2	333	0.773519
F0SHW6	Cytochrome c oxidase, cbb3-type, subunit I n=1 Tax=Planctomyces brasiliensis DSM 5305 RepID=F0SHW6_PLABD	771	2	347.5	0.300476
B7GW12	50S ribosomal protein L14 n=47 Tax=Moraxellaceae RepID=RL14_ACIB3	122	2	449	2.45355
F4YA77	Hef53 n=3 Tax=unclassified Myoviridae RepID=F4YA77_9CAUD	543	2	298	0.365869
C7MB58	ABC-type multidrug transport system, ATPase and permease component n=1 Tax=Brachybacterium faecium DSM 4810 RepID=C7MB58_BRAFD	626	2	297	0.316294
B4D8U2	Cyclopropane-fatty-acyl-phospholipid synthase n=1 Tax=Chthoniobacter flavus Ellin428 RepID=B4D8U2_9BACT	427	2	379.5	0.592506
G3IVV3	CDP-glucose 4,6-dehydratase n=1 Tax=Methylobacter tundripaludum SV96 RepID=G3IVV3_9GAMM	369	2	377	0.68112
H1N5G5	Glycosyl transferase family 2 n=1 Tax=Singulisphaera acidiphila DSM 18658 RepID=H1N5G5_9PLAN	2281	2	398	0.116323
G4DD54	Glutathione synthetase n=1 Tax=Thioalkalivibrio thiocyanoxidans ARh 4 RepID=G4DD54_9GAMM	317	2	580.5	1.22082
F4P586	Putative uncharacterized protein n=1 Tax=Batrachochytrium dendrobatidis JAM81 RepID=F4P586_BATDJ	766	2	319	0.277633
B8GQ18	Glycosyl transferase family 39 n=1 Tax=Thioalkalivibrio sulfidophilus HL-EbGr7 RepID=B8GQ18_THISH	498	2	399.5	0.534806
G4FB13	Putative uncharacterized protein n=1 Tax=Halomonas sp. HAL1 RepID=G4FB13_9GAMM	320	2	524.5	1.09271
A3JJ34	Lysine-arginine-ornithine-binding periplasmic protein n=1 Tax=Marinobacter sp. ELB17 RepID=A3JJ34_9ALTE	340	2	371.5	0.728431
Q2LYC9	Superfamily II DNA/RNA helicase, SNF2 family n=1 Tax=Syntrophus aciditrophicus SB RepID=Q2LYC9_SYNAS	1193	2	613.5	0.342833
D3SC62	Adenylylsulfate reductase, beta subunit n=3 Tax=Gammaproteobacteria RepID=D3SC62_THISK	159	2	552	2.31447
B8GQJ0	Putative uncharacterized protein n=1 Tax=Thioalkalivibrio sulfidophilus HL-EbGr7 RepID=B8GQJ0_THISH	86	2	417	3.23256
UPI000255A397	extracellular solute-binding protein, family 7 n=1 Tax=Marinobacterium stanieri S30 RepID=UPI000255A397	355	2	585	1.09859
G4DJD6	Phosphate ABC transporter, inner membrane subunit PstA n=1 Tax=Thioalkalivibrio thiocyanoxidans ARh 4 RepID=G4DJD6_9GAMM	550	2	629.5	0.76303
A3QSS7	Chloroplast fructose-1,6-bisphosphatase n=1 Tax=Euglena gracilis RepID=A3QSS7_EUGGR	555	2	257	0.308709
A3QSS5	Chloroplast fructose-1,6-bisphosphatase n=1 Tax=Guillardia theta RepID=A3QSS5_GUITH	443	2	320	0.481565
Q7UW62	Putative uncharacterized protein n=2 Tax=Rhodopirellula baltica RepID=Q7UW62_RHOBA	579	2	342.5	0.394358
B8GUD7	Putative uncharacterized protein n=1 Tax=Thioalkalivibrio sulfidophilus HL-EbGr7 RepID=B8GUD7_THISH	66	2	421	4.25253
G4DEU1	Putative uncharacterized protein n=1 Tax=Thioalkalivibrio thiocyanoxidans ARh 4 RepID=G4DEU1_9GAMM	280	2	518	1.23333
G4DM10	Lon protease n=1 Tax=Thioalkalivibrio thiocyanoxidans ARh 4 RepID=G4DM10_9GAMM	815	2	583	0.476892
E1V7N0	Lon protease n=1 Tax=Halomonas elongata DSM 2581 RepID=E1V7N0_HALED	811	2	372	0.305795
G2IDF9	50S ribosomal protein L14 n=10 Tax=Candidatus Arthromitus RepID=G2IDF9_9CLOT	122	2	200	1.0929
F0EZ46	Putative uncharacterized protein n=2 Tax=Betaproteobacteria RepID=F0EZ46_9NEIS	240	2	498	1.38333
B8GN85	Putative uncharacterized protein n=1 Tax=Thioalkalivibrio sulfidophilus HL-EbGr7 RepID=B8GN85_THISH	280	2	514	1.22381
G4DKY7	Carbamoyl-phosphate synthase large chain n=1 Tax=Thioalkalivibrio thiocyanoxidans ARh 4 RepID=G4DKY7_9GAMM	1079	2	416.5	0.257337
G0R614	Putative uncharacterized protein n=1 Tax=Ichthyophthirius multifiliis strain G5 RepID=G0R614_ICHMG	1950	2	515.5	0.176239
G8DEI6	Putative uncharacterized protein n=2 Tax=unclassified dsDNA viruses RepID=G8DEI6_9VIRU	1191	2	582	0.325777
D0SX08	Acridine efflux pump AdeY n=1 Tax=Acinetobacter lwoffii SH145 RepID=D0SX08_ACILW	1058	2	468.5	0.295211
G4E588	Chaperone protein DnaK n=1 Tax=Thiorhodospira sibirica ATCC 700588 RepID=G4E588_9GAMM	644	2	386	0.399586
A4LNB5	Putative uncharacterized protein n=1 Tax=Burkholderia pseudomallei 305 RepID=A4LNB5_BURPE	193	2	539	1.86183
B5W509	ABC-type nitrate/nitrite transport system substrate-binding protein n=5 Tax=Arthrospira RepID=B5W509_SPIMA	432	2	464	0.716049
F3QKQ6	Putative uncharacterized protein n=1 Tax=Parasutterella excrementihominis YIT 11859 RepID=F3QKQ6_9BURK	53	2	208	2.61635
D0SBV3	Electron transfer flavoprotein subunit beta n=3 Tax=Acinetobacter RepID=D0SBV3_ACIJO	250	2	474.5	1.26533
Q3SKG0	Nitric oxide reductase activation protein n=1 Tax=Thiobacillus denitrificans ATCC 25259 RepID=Q3SKG0_THIDA	705	2	466	0.440662
D2HLV7	Putative uncharacterized protein (Fragment) n=1 Tax=Ailuropoda melanoleuca RepID=D2HLV7_AILME	420	2	345	0.547619
D2QL74	Putative uncharacterized protein n=1 Tax=Spirosoma linguale DSM 74 RepID=D2QL74_SPILD	1129	2	403	0.237969
D7G4V3	Putative uncharacterized protein n=2 Tax=Ectocarpus siliculosus RepID=D7G4V3_ECTSI	1506	2	596.5	0.264055
B8DNZ4	RNA binding S1 domain protein n=2 Tax=Desulfovibrio RepID=B8DNZ4_DESVM	756	2	401	0.353616
B3CHJ0	Putative uncharacterized protein n=2 Tax=Bacteroides RepID=B3CHJ0_9BACE	612	2	360	0.392157
A7RUQ6	Predicted protein (Fragment) n=1 Tax=Nematostella vectensis RepID=A7RUQ6_NEMVE	371	2	524	0.941599
Q8Y0X7	Putative signal peptide protein n=1 Tax=Ralstonia solanacearum GMI1000 RepID=Q8Y0X7_RALSO	105	2	353.5	2.24444
H9K1D1	Uncharacterized protein n=1 Tax=Apis mellifera RepID=H9K1D1_APIME	331	2	458.5	0.923464
A4CXI1	Putative efflux transporter family protein n=1 Tax=Synechococcus sp. WH 7805 RepID=A4CXI1_SYNPV	346	2	471	0.907514
A9V9W4	Predicted protein n=1 Tax=Monosiga brevicollis RepID=A9V9W4_MONBE	579	2	543	0.625216
A3X5N3	Putative uncharacterized protein n=1 Tax=Roseobacter sp. MED193 RepID=A3X5N3_9RHOB	1032	2	430.5	0.278101
A1K4R3	Putative iron-sulfur protein n=1 Tax=Azoarcus sp. BH72 RepID=A1K4R3_AZOSB	366	2	593	1.08015
G4DHE6	Cytochrome c-type biogenesis protein CcmF n=2 Tax=Thioalkalivibrio thiocyanoxidans ARh 4 RepID=G4DHE6_9GAMM	669	2	458.5	0.456901
C7NU02	GLUG domain protein n=1 Tax=Halorhabdus utahensis DSM 12940 RepID=C7NU02_HALUD	3333	2	472.5	0.0945095
Q3E813	Uncharacterized protein YLR154C-G n=4 Tax=Saccharomyces cerevisiae RepID=YL154_YEAST	49	2	244	3.31973
H0PXW0	Putative uncharacterized protein n=1 Tax=Azoarcus sp. KH32C RepID=H0PXW0_9RHOO	857	2	262	0.203812
E9CAG2	Putative uncharacterized protein n=1 Tax=Capsaspora owczarzaki ATCC 30864 RepID=E9CAG2_CAPO3	446	2	477.5	0.713752
D2VQB9	Predicted protein n=1 Tax=Naegleria gruberi RepID=D2VQB9_NAEGR	621	2	461	0.494901
G0IXF9	RagB/SusD domain-containing protein n=1 Tax=Cyclobacterium marinum DSM 745 RepID=G0IXF9_CYCMS	591	2	480.5	0.542019
UPI00017455ED	hypothetical protein VspiD_14025 n=1 Tax=Verrucomicrobium spinosum DSM 4136 RepID=UPI00017455ED	455	2	552	0.808791
E3T5M5	Ribonucleoside-diphosphate reductase n=2 Tax=Cafeteria roenbergensis virus BV-PW1 RepID=E3T5M5_9VIRU	1257	2	500	0.265182
A4AS22	Putative uncharacterized protein n=1 Tax=Maribacter sp. HTCC2170 RepID=A4AS22_MARSH	116	2	420	2.41379
C5DM46	Peptidyl-prolyl cis-trans isomerase n=1 Tax=Lachancea thermotolerans CBS 6340 RepID=C5DM46_LACTC	208	2	382.5	1.22596
A3JDZ0	Predicted ATPase n=1 Tax=Marinobacter sp. ELB17 RepID=A3JDZ0_9ALTE	387	2	415	0.714901
H5WNC8	Rhodanese-related sulfurtransferase n=1 Tax=Burkholderiales bacterium JOSHI_001 RepID=H5WNC8_9BURK	433	2	408	0.628176
UPI0001DE93D7	UPI0001DE93D7 related cluster n=1 Tax=unknown RepID=UPI0001DE93D7	255	2	270.5	0.70719
H8YXH1	Putative uncharacterized protein n=1 Tax=Thiorhodovibrio sp. 970 RepID=H8YXH1_9GAMM	160	2	515.5	2.14792
C4ZP48	Intradiol ring-cleavage dioxygenase n=1 Tax=Thauera sp. MZ1T RepID=C4ZP48_THASP	220	2	560	1.69697
Q3JDB0	Heat shock protein Hsp70 n=1 Tax=Nitrosococcus oceani ATCC 19707 RepID=Q3JDB0_NITOC	830	2	358	0.28755
D0SZV5	Outer membrane receptor protein n=1 Tax=Acinetobacter lwoffii SH145 RepID=D0SZV5_ACILW	726	2	449.5	0.412764
H8GGF9	Methane monooxygenase/ammonia monooxygenase, subunit A n=1 Tax=Methylomicrobium album BG8 RepID=H8GGF9_METAL	247	2	280.5	0.757085
D4H4P2	Transposase IS3/IS911 family protein n=2 Tax=Denitrovibrio acetiphilus DSM 12809 RepID=D4H4P2_DENA2	364	2	643.5	1.17857
G4DHD4	ABC transporter related protein n=1 Tax=Thioalkalivibrio thiocyanoxidans ARh 4 RepID=G4DHD4_9GAMM	632	2	469.5	0.495253
A6GR25	Cell division protein ftsZ n=1 Tax=Limnobacter sp. MED105 RepID=A6GR25_9BURK	389	2	403.5	0.691517
A3ZP54	Putative uncharacterized protein n=1 Tax=Blastopirellula marina DSM 3645 RepID=A3ZP54_9PLAN	561	2	368.5	0.437908
B3EKR0	Putative uncharacterized protein n=1 Tax=Chlorobium phaeobacteroides BS1 RepID=B3EKR0_CHLPB	1171	2	361.5	0.205807
C8Z7M1	EC1118_1F14_0133p n=3 Tax=Saccharomyces RepID=C8Z7M1_YEAS8	269	2	544.5	1.34944
G2E5S1	CRISPR-associated protein Cas1 n=1 Tax=Thiorhodococcus drewsii AZ1 RepID=G2E5S1_9GAMM	344	2	499	0.967054
F7KE27	Putative uncharacterized protein n=1 Tax=Lachnospiraceae bacterium 3_1_57FAA_CT1 RepID=F7KE27_9FIRM	176	2	482	1.82576
D2R211	Putative uncharacterized protein n=1 Tax=Pirellula staleyi DSM 6068 RepID=D2R211_PIRSD	321	2	513	1.06542
A1BDB0	Transposase, IS4 family n=1 Tax=Chlorobium phaeobacteroides DSM 266 RepID=A1BDB0_CHLPD	554	2	484	0.582431
A5CZB8	Retron-type reverse transcriptase n=1 Tax=Pelotomaculum thermopropionicum SI RepID=A5CZB8_PELTS	423	2	427	0.672971
B8GMR2	Binding-protein-dependent transport systems inner membrane component n=1 Tax=Thioalkalivibrio sulfidophilus HL-EbGr7 RepID=B8GMR2_THISH	765	2	512	0.446187
B4D119	Band 7 protein n=1 Tax=Chthoniobacter flavus Ellin428 RepID=B4D119_9BACT	258	2	509	1.31525
C0SK31	Alpha tubulin (Fragment) n=1 Tax=Paraphysomonas imperforata RepID=C0SK31_9STRA	297	2	257.5	0.578002
D3NW61	Monocarboxylate transporter n=2 Tax=Azospirillum RepID=D3NW61_AZOS1	416	2	360.5	0.577724
B9XNE6	Putative uncharacterized protein n=1 Tax=Pedosphaera parvula Ellin514 RepID=B9XNE6_9BACT	455	2	466	0.682784
H8GWS3	ABC-type transport system, ATPase component/ photorepair protein PhrA n=1 Tax=Deinococcus gobiensis I-0 RepID=H8GWS3_9DEIO	705	2	392.5	0.371158
A6CAD6	Putative uncharacterized protein n=1 Tax=Planctomyces maris DSM 8797 RepID=A6CAD6_9PLAN	481	2	576.5	0.79903
G4DJA5	Putative uncharacterized protein n=1 Tax=Thioalkalivibrio thiocyanoxidans ARh 4 RepID=G4DJA5_9GAMM	69	2	472	4.56039
F3KCR1	Putative uncharacterized protein n=1 Tax=gamma proteobacterium IMCC2047 RepID=F3KCR1_9GAMM	419	2	511.5	0.813842
UPI0001744E00	putative transposase n=1 Tax=Verrucomicrobium spinosum DSM 4136 RepID=UPI0001744E00	97	2	493	3.38832
Q9AIX7	Benzoyl-CoA oxygenase component B n=6 Tax=Rhodocyclaceae RepID=BOXB_AZOEV	473	2	323	0.45525
H3GK17	Uncharacterized protein n=1 Tax=Phytophthora ramorum RepID=H3GK17_PHYRM	4326	2	346	0.053321
G4ZCF4	Putative uncharacterized protein (Fragment) n=1 Tax=Phytophthora sojae strain P6497 RepID=G4ZCF4_PHYSP	685	2	526	0.511922
Q098W3	Conserved uncharacterized protein n=1 Tax=Stigmatella aurantiaca DW4/3-1 RepID=Q098W3_STIAD	1196	2	634	0.3534
A1K2X4	Nitrogenase iron-molybdenum cofactor biosynthesis protein NifE n=1 Tax=Azoarcus sp. BH72 RepID=A1K2X4_AZOSB	500	2	375	0.5
E0XW25	Putative uncharacterized protein n=1 Tax=uncultured Rhodospirillales bacterium HF4000_24M03 RepID=E0XW25_9PROT	90	2	336	2.48889
B5HD57	Transcriptional regulator n=1 Tax=Streptomyces pristinaespiralis ATCC 25486 RepID=B5HD57_STRPR	665	2	379	0.37995
A1VV83	PglZ domain n=1 Tax=Polaromonas naphthalenivorans CJ2 RepID=A1VV83_POLNA	908	2	506	0.371512
F7Q2V3	Phage integrase family protein n=1 Tax=Salinisphaera shabanensis E1L3A RepID=F7Q2V3_9GAMM	402	2	380.5	0.631012
C8A1Y4	Putative uncharacterized protein n=4 Tax=Bacillales RepID=C8A1Y4_STAAU	89	2	286.5	2.14607
G4STG9	Pyrophosphate-fructose 6-phosphate 1-phosphotransferase n=1 Tax=Methylomicrobium alcaliphilum 20Z RepID=G4STG9_META2	409	2	334.5	0.545232
D0SVN0	Ribosomal protein L11 methyltransferase n=1 Tax=Acinetobacter lwoffii SH145 RepID=D0SVN0_ACILW	301	2	469.5	1.03987
D2XJC7	Putative uncharacterized protein n=1 Tax=Escherichia phage K1-dep(1) RepID=D2XJC7_9CAUD	170	2	555	2.17647
A0CTV0	Chromosome undetermined scaffold_27, whole genome shotgun sequence n=1 Tax=Paramecium tetraurelia RepID=A0CTV0_PARTE	881	2	393	0.297389
A8AB59	Putative uncharacterized protein n=1 Tax=Ignicoccus hospitalis KIN4/I RepID=A8AB59_IGNH4	1051	2	533	0.338091
G4DJ39	Lipid-A-disaccharide synthase n=1 Tax=Thioalkalivibrio thiocyanoxidans ARh 4 RepID=G4DJ39_9GAMM	386	2	439.5	0.759067
B5RUQ6	DEHA2G11297p n=1 Tax=Debaryomyces hansenii CBS767 RepID=B5RUQ6_DEBHA	1488	2	578.5	0.259185
H3J208	Uncharacterized protein n=1 Tax=Strongylocentrotus purpuratus RepID=H3J208_STRPU	583	2	394.5	0.451115
B0D0Z2	Aminophospholipid-transporting P-type ATPase n=1 Tax=Laccaria bicolor S238N-H82 RepID=B0D0Z2_LACBS	1208	2	495.5	0.273455
Q0ADE8	SMC domain protein n=1 Tax=Nitrosomonas eutropha C91 RepID=Q0ADE8_NITEC	1083	2	630.5	0.388119
D0STR3	Putative uncharacterized protein n=1 Tax=Acinetobacter lwoffii SH145 RepID=D0STR3_ACILW	138	2	403	1.94686
B8KQZ0	Aminoglycoside phosphotransferase n=1 Tax=gamma proteobacterium NOR51-B RepID=B8KQZ0_9GAMM	333	2	268	0.536537
Q23BZ6	XYPPX repeat family protein n=1 Tax=Tetrahymena thermophila SB210 RepID=Q23BZ6_TETTS	292	2	444	1.0137
Q22B72	Lecithin:cholesterol acyltransferase family protein n=1 Tax=Tetrahymena thermophila SB210 RepID=Q22B72_TETTS	651	2	491.5	0.503328
E7RY34	Putative type III restriction enzyme, res subunit n=1 Tax=Lautropia mirabilis ATCC 51599 RepID=E7RY34_9BURK	901	2	380.5	0.281539
G4SXD6	Ferrochelatase n=1 Tax=Methylomicrobium alcaliphilum 20Z RepID=G4SXD6_META2	359	2	399	0.740947
G4DHB8	Methionine synthase n=1 Tax=Thioalkalivibrio thiocyanoxidans ARh 4 RepID=G4DHB8_9GAMM	1254	2	496.5	0.263955
F2Y1A9	Putative uncharacterized protein n=1 Tax=Organic Lake phycodnavirus 1 RepID=F2Y1A9_9PHYC	277	2	578.5	1.3923
F2IE23	Phospho-2-dehydro-3-deoxyheptonate aldolase n=1 Tax=Fluviicola taffensis DSM 16823 RepID=F2IE23_FLUTR	332	2	486	0.975904
F0VYL4	Protocadherinlike protein putative n=1 Tax=Albugo laibachii Nc14 RepID=F0VYL4_9STRA	14400	2	451.5	0.0209028
Q1YV61	Putative response regulator n=1 Tax=gamma proteobacterium HTCC2207 RepID=Q1YV61_9GAMM	490	2	364	0.495238
A7IK08	50S ribosomal protein L9 n=1 Tax=Xanthobacter autotrophicus Py2 RepID=RL9_XANP2	193	2	365.5	1.26252
Q2FQP6	Chaperone protein DnaJ n=1 Tax=Methanospirillum hungatei JF-1 RepID=Q2FQP6_METHJ	378	2	279	0.492063
B4VH57	Cyclic nucleotide-binding domain protein n=1 Tax=Microcoleus chthonoplastes PCC 7420 RepID=B4VH57_9CYAN	186	2	465	1.66667
E9P6A5	NADH dehydrogenase subunit 2 n=1 Tax=Pavlova lutheri RepID=E9P6A5_PAVLU	504	2	172.5	0.228175
F5LB49	Putative uncharacterized protein (Fragment) n=1 Tax=Caldalkalibacillus thermarum TA2.A1 RepID=F5LB49_9BACI	169	2	232	0.915187
G4DIY6	FeS assembly SUF system protein SufT n=1 Tax=Thioalkalivibrio thiocyanoxidans ARh 4 RepID=G4DIY6_9GAMM	181	2	419	1.54328
F0YEW3	Putative uncharacterized protein n=1 Tax=Aureococcus anophagefferens RepID=F0YEW3_AURAN	313	2	446.5	0.951012
D5AQ18	Aminopeptidase N n=1 Tax=Rhodobacter capsulatus SB 1003 RepID=D5AQ18_RHOCB	848	2	497	0.390723
G6GZ26	Sulfatase n=3 Tax=Cyanothece RepID=G6GZ26_9CHRO	564	2	491	0.580378
A9NF69	Glutamyl aminopeptidase, M42 family n=1 Tax=Acholeplasma laidlawii PG-8A RepID=A9NF69_ACHLI	348	2	633	1.21264
Q1K463	Alpha-L-glutamate ligase-related protein n=1 Tax=Desulfuromonas acetoxidans DSM 684 RepID=Q1K463_DESAC	315	2	475	1.00529
B9XPL1	DNA polymerase III, alpha subunit n=1 Tax=Pedosphaera parvula Ellin514 RepID=B9XPL1_9BACT	1224	2	226.5	0.123366
H1XQN7	TonB-dependent receptor plug n=1 Tax=Caldithrix abyssi DSM 13497 RepID=H1XQN7_9BACT	1035	2	428	0.275684
F1M4M0	Uncharacterized protein (Fragment) n=1 Tax=Rattus norvegicus RepID=F1M4M0_RAT	231	2	429	1.2381
D7CKE8	Shikimate kinase n=1 Tax=Syntrophothermus lipocalidus DSM 12680 RepID=D7CKE8_SYNLT	175	2	424	1.61524
G0QZK0	Glutamate dehydrogenase n=1 Tax=Ichthyophthirius multifiliis strain G5 RepID=G0QZK0_ICHMG	491	2	551	0.748133
A0ZG26	Putative uncharacterized protein n=1 Tax=Nodularia spumigena CCY9414 RepID=A0ZG26_NODSP	350	2	358.5	0.682857
C7MEB9	Phosphomannomutase n=1 Tax=Brachybacterium faecium DSM 4810 RepID=C7MEB9_BRAFD	575	2	507.5	0.588406
C6IKK3	DNA helicase n=2 Tax=Bacteroides RepID=C6IKK3_9BACE	1124	2	336	0.199288
H6RE12	Translation elongation factor G n=1 Tax=uncultured Flavobacteriia bacterium RepID=H6RE12_9BACT	711	2	615.5	0.577121
G0QWD8	Leishmanolysin family protein, putative (Fragment) n=1 Tax=Ichthyophthirius multifiliis strain G5 RepID=G0QWD8_ICHMG	904	2	458.5	0.338127
E1ZAG3	Expressed protein n=1 Tax=Chlorella variabilis RepID=E1ZAG3_CHLVA	799	2	483.5	0.403421
B8GNZ1	NADH-quinone oxidoreductase, chain G n=1 Tax=Thioalkalivibrio sulfidophilus HL-EbGr7 RepID=B8GNZ1_THISH	791	2	306	0.257901
E8QXG0	Putative uncharacterized protein n=1 Tax=Isosphaera pallida ATCC 43644 RepID=E8QXG0_ISOPI	687	2	403	0.391072
E6QVY7	Transposase of ISCARN109, IS1182 family n=1 Tax=mine drainage metagenome RepID=E6QVY7_9ZZZZ	367	2	448	0.813806
H2EEA1	Putative DNA mismatch repair protein MutS-like protein n=1 Tax=Moumouvirus Monve RepID=H2EEA1_9VIRU	1679	2	550	0.218384
UPI00021A59E6	UPI00021A59E6 related cluster n=1 Tax=unknown RepID=UPI00021A59E6	1457	2	326	0.149165
UPI00006CF99C	UPI00006CF99C related cluster n=1 Tax=unknown RepID=UPI00006CF99C	1955	2	477	0.16266
G4DFX0	Type I secretion outer membrane protein, TolC family n=1 Tax=Thioalkalivibrio thiocyanoxidans ARh 4 RepID=G4DFX0_9GAMM	439	2	306.5	0.465452
G4DFB8	ATP-dependent chaperone ClpB n=1 Tax=Thioalkalivibrio thiocyanoxidans ARh 4 RepID=G4DFB8_9GAMM	857	2	485	0.377285
G4DDR4	60 kDa chaperonin n=1 Tax=Thioalkalivibrio thiocyanoxidans ARh 4 RepID=G4DDR4_9GAMM	551	2	507	0.61343
G4DFT8	Heat shock protein Hsp20 n=1 Tax=Thioalkalivibrio thiocyanoxidans ARh 4 RepID=G4DFT8_9GAMM	143	2	388	1.80886
B8BPW1	Predicted protein n=1 Tax=Thalassiosira pseudonana RepID=B8BPW1_THAPS	413	2	432.5	0.698144
G4DIT7	CBS domain containing membrane protein n=1 Tax=Thioalkalivibrio thiocyanoxidans ARh 4 RepID=G4DIT7_9GAMM	142	2	327	1.53521
B8BV82	Predicted protein n=1 Tax=Thalassiosira pseudonana RepID=B8BV82_THAPS	142	2	451	2.11737
D3SAP6	Putative uncharacterized protein n=1 Tax=Thioalkalivibrio sp. K90mix RepID=D3SAP6_THISK	173	2	336.5	1.29672
G4DGP7	TRAP transporter, 4TM/12TM fusion protein n=1 Tax=Thioalkalivibrio thiocyanoxidans ARh 4 RepID=G4DGP7_9GAMM	716	2	423.5	0.39432
P51322	Photosystem II CP47 chlorophyll apoprotein n=3 Tax=Rhodophyta RepID=PSBB_PORPU	509	2	396	0.518664
B9XFP5	Elongation factor Tu n=1 Tax=Pedosphaera parvula Ellin514 RepID=B9XFP5_9BACT	396	2	426.5	0.718013
Q7NLM6	Serine/threonine protein kinase n=1 Tax=Gloeobacter violaceus PCC 7421 RepID=Q7NLM6_GLOVI	913	2	464	0.33881
Q22PK5	Amidase family protein n=1 Tax=Tetrahymena thermophila SB210 RepID=Q22PK5_TETTS	609	2	529.5	0.579639
H1YEW5	DNA polymerase III, epsilon subunit n=1 Tax=Mucilaginibacter paludis DSM 18603 RepID=H1YEW5_9SPHI	456	2	361.5	0.528509
F0EZ41	Putative uncharacterized protein n=1 Tax=Kingella denitrificans ATCC 33394 RepID=F0EZ41_9NEIS	151	2	354	1.56291
D2R4I5	Lysine--tRNA ligase n=1 Tax=Pirellula staleyi DSM 6068 RepID=D2R4I5_PIRSD	528	2	351.5	0.443813
G4DI05	Cytochrome c class I n=1 Tax=Thioalkalivibrio thiocyanoxidans ARh 4 RepID=G4DI05_9GAMM	103	2	500	3.23625
D9Y4Q0	L-asparaginase n=2 Tax=Burkholderiales RepID=D9Y4Q0_9BURK	365	2	636.5	1.16256
D2V5V5	Putative uncharacterized protein n=1 Tax=Naegleria gruberi RepID=D2V5V5_NAEGR	4374	2	558	0.085048
E3SMU4	Terminase DNA packaging enzyme large subunit n=2 Tax=unclassified Myoviridae RepID=E3SMU4_9CAUD	560	2	341	0.405952
F4KRP8	TonB-dependent receptor n=1 Tax=Haliscomenobacter hydrossis DSM 1100 RepID=F4KRP8_HALH1	886	2	350	0.263356
D0NQN0	Prolyl endopeptidase, putative n=3 Tax=Phytophthora RepID=D0NQN0_PHYIT	752	2	437	0.387411
G4DLE9	D-isomer specific 2-hydroxyacid dehydrogenase NAD-binding n=1 Tax=Thioalkalivibrio thiocyanoxidans ARh 4 RepID=G4DLE9_9GAMM	320	2	465.5	0.969792
Q5P7S4	Zn-dependent peptidase, potential modulator of DNA gyrase n=1 Tax=Aromatoleum aromaticum EbN1 RepID=Q5P7S4_AROAE	481	2	597.5	0.828136
B0C9I9	Glycosyl transferase, group 1 family protein n=2 Tax=Acaryochloris RepID=B0C9I9_ACAM1	402	2	483	0.800995
D7A156	TRAP dicarboxylate transporter, DctM subunit n=1 Tax=Starkeya novella DSM 506 RepID=D7A156_STAND	442	2	521	0.785822
H6SIA7	Putative uncharacterized protein (Fragment) n=2 Tax=Rhodospirillaceae RepID=H6SIA7_RHOPH	109	2	434	2.65443
A6CFD1	Putative uncharacterized protein n=1 Tax=Planctomyces maris DSM 8797 RepID=A6CFD1_9PLAN	464	2	332.5	0.47773
F5UNF8	FG-GAP repeat protein n=1 Tax=Microcoleus vaginatus FGP-2 RepID=F5UNF8_9CYAN	2376	2	296	0.0830527
Q5DWS3	Photosystem II CP43 protein (Fragment) n=3 Tax=Pavlova RepID=Q5DWS3_9EUKA	352	2	443.5	0.839962
D7FT06	Putative uncharacterized protein n=1 Tax=Ectocarpus siliculosus RepID=D7FT06_ECTSI	2035	2	376	0.123178
Q2WEE7	Photosystem II CP47 chlorophyll apoprotein (Fragment) n=2 Tax=Pavlova RepID=Q2WEE7_9EUKA	453	2	313	0.460633
H8Z4J0	Putative uncharacterized protein n=2 Tax=Thiorhodovibrio sp. 970 RepID=H8Z4J0_9GAMM	602	2	439.5	0.486711
B8GUE6	Sulfite reductase, dissimilatory-type beta subunit n=2 Tax=Thioalkalivibrio RepID=B8GUE6_THISH	359	2	325.5	0.604457
A1K4F0	Protein-L-isoaspartate O-methyltransferase n=2 Tax=Azoarcus sp. BH72 RepID=PIMT_AZOSB	217	2	471.5	1.44854
F0YMM4	Putative uncharacterized protein n=2 Tax=Aureococcus anophagefferens RepID=F0YMM4_AURAN	591	2	561.5	0.63339
H0PXK2	Cytochrome b n=4 Tax=Rhodocyclaceae RepID=H0PXK2_9RHOO	422	2	434	0.685624
D5QM04	Methyltransferase type 11 n=1 Tax=Methylosinus trichosporium OB3b RepID=D5QM04_METTR	351	2	563	1.06933
G7WPL2	Type I site-specific deoxyribonuclease chain R n=1 Tax=Methanosaeta harundinacea 6Ac RepID=G7WPL2_METH6	981	2	523	0.35542
F6DA95	Filamentous hemagglutinin family outer membrane protein n=1 Tax=Thioalkalimicrobium cyclicum ALM1 RepID=F6DA95_THICA	29202	2	472	0.0107755
D0SUQ8	Predicted protein n=1 Tax=Acinetobacter lwoffii SH145 RepID=D0SUQ8_ACILW	211	2	333.5	1.05371
H2BCU9	Putative uncharacterized protein n=1 Tax=Synechococcus phage S-CBS4 RepID=H2BCU9_9CAUD	282	2	612	1.44681
A6DSM5	Arylsulfatase A (Precursor) n=1 Tax=Lentisphaera araneosa HTCC2155 RepID=A6DSM5_9BACT	401	2	200	0.332502
G4Z367	Putative uncharacterized protein n=1 Tax=Phytophthora sojae strain P6497 RepID=G4Z367_PHYSP	219	2	319	0.971081
A0AEH0	Putative transposase n=1 Tax=Pseudomonas extremaustralis RepID=A0AEH0_9PSED	457	2	565.5	0.824945
B6B446	Glutamate/aspartate transport protein, ABC superfamily n=1 Tax=Rhodobacteraceae bacterium HTCC2083 RepID=B6B446_9RHOB	243	2	294	0.806584
C6M4F2	Phage portal protein, lambda family n=9 Tax=Neisseria RepID=C6M4F2_NEISI	520	2	571.5	0.732692
Q2CGL3	Glucose 1-dehydrogenase, putative n=1 Tax=Oceanicola granulosus HTCC2516 RepID=Q2CGL3_9RHOB	250	2	567	1.512
C4ZPD0	ATP/cobalamin adenosyltransferase n=1 Tax=Thauera sp. MZ1T RepID=C4ZPD0_THASP	183	2	370	1.34791
G4STM9	Elongation factor Tu n=1 Tax=Methylomicrobium alcaliphilum 20Z RepID=G4STM9_META2	396	2	252.5	0.425084
A5FD66	Putative uncharacterized protein n=1 Tax=Flavobacterium johnsoniae UW101 RepID=A5FD66_FLAJ1	1105	2	339	0.204525
B8GUU2	6-phosphofructokinase n=1 Tax=Thioalkalivibrio sulfidophilus HL-EbGr7 RepID=B8GUU2_THISH	403	2	423	0.699752
B8GUU0	Sulfate adenylyltransferase n=1 Tax=Thioalkalivibrio sulfidophilus HL-EbGr7 RepID=B8GUU0_THISH	402	2	395	0.655058
F6IXS9	PTS family porter, B component n=1 Tax=Lactobacillus pentosus MP-10 RepID=F6IXS9_LACPE	93	2	370	2.65233
G4DGS9	Major facilitator superfamily MFS_1 n=1 Tax=Thioalkalivibrio thiocyanoxidans ARh 4 RepID=G4DGS9_9GAMM	463	2	584.5	0.841613
B8HVM4	Type III pantothenate kinase n=1 Tax=Cyanothece sp. PCC 7425 RepID=B8HVM4_CYAP4	264	2	360	0.909091
Q5GQK4	DNA polymerase n=1 Tax=Synechococcus phage S-PM2 RepID=Q5GQK4_BPSYP	830	2	582.5	0.467871
G4DGL0	General secretion pathway protein L n=1 Tax=Thioalkalivibrio thiocyanoxidans ARh 4 RepID=G4DGL0_9GAMM	410	2	456	0.741463
A9XBI2	Cytosolic class I small heat-shock protein HSP17.5 n=2 Tax=Rosoideae RepID=A9XBI2_ROSHC	156	2	406	1.73504
Q24E74	Putative uncharacterized protein n=1 Tax=Tetrahymena thermophila SB210 RepID=Q24E74_TETTS	238	2	439.5	1.23109
C6KUH3	Type II restriction enzyme, methylase subunit n=1 Tax=uncultured bacterium RepID=C6KUH3_9BACT	641	2	395	0.410816
UPI0002038783	UPI0002038783 related cluster n=1 Tax=unknown RepID=UPI0002038783	925	2	351	0.252973
F8GYU1	Prophage lambdaSa1 transcriptase/maturase family protein n=1 Tax=Cupriavidus necator N-1 RepID=F8GYU1_CUPNN	434	2	618	0.949309
G4DHN5	DNA ligase n=1 Tax=Thioalkalivibrio thiocyanoxidans ARh 4 RepID=G4DHN5_9GAMM	673	2	516.5	0.511639
A8J7I6	Predicted protein n=1 Tax=Chlamydomonas reinhardtii RepID=A8J7I6_CHLRE	595	2	523.5	0.586555
G4DGX0	Carboxyl-terminal protease n=1 Tax=Thioalkalivibrio thiocyanoxidans ARh 4 RepID=G4DGX0_9GAMM	434	2	419	0.643625
A3SI83	MORN repeat protein n=1 Tax=Roseovarius nubinhibens ISM RepID=A3SI83_9RHOB	515	2	629	0.814239
O78427	Photosystem II D2 protein n=8 Tax=Eukaryota RepID=PSBD_GUITH	351	2	549	1.04274
F4P537	Putative uncharacterized protein n=1 Tax=Batrachochytrium dendrobatidis JAM81 RepID=F4P537_BATDJ	810	2	268	0.220576
D6ZAQ7	Putative uncharacterized protein n=1 Tax=Segniliparus rotundus DSM 44985 RepID=D6ZAQ7_SEGRD	265	2	334	0.840252
C4ZP12	Sigma54 specific transcriptional regulator, Fis family n=1 Tax=Thauera sp. MZ1T RepID=C4ZP12_THASP	466	2	199	0.284692
B3D9S8	Putative uncharacterized protein n=1 Tax=Burkholderia multivorans ATCC 17616 RepID=B3D9S8_BURM1	120	2	216.5	1.20278
F2IDL1	Putative uncharacterized protein n=1 Tax=Fluviicola taffensis DSM 16823 RepID=F2IDL1_FLUTR	1055	2	496.5	0.313744
Q24BW9	AT hook motif family protein n=1 Tax=Tetrahymena thermophila SB210 RepID=Q24BW9_TETTS	2387	2	590	0.164781
G4T0K4	3-hexulose-6-phosphate isomerase n=1 Tax=Methylomicrobium alcaliphilum 20Z RepID=G4T0K4_META2	177	2	517.5	1.94915
G4T0K3	Transketolase n=1 Tax=Methylomicrobium alcaliphilum 20Z RepID=G4T0K3_META2	670	2	514	0.511443
G0QT12	Putative uncharacterized protein n=1 Tax=Ichthyophthirius multifiliis strain G5 RepID=G0QT12_ICHMG	299	2	494	1.10145
G4DK59	Uridylate kinase n=1 Tax=Thioalkalivibrio thiocyanoxidans ARh 4 RepID=G4DK59_9GAMM	244	2	641	1.75137
G5AHX7	Putative uncharacterized protein n=1 Tax=Phytophthora sojae strain P6497 RepID=G5AHX7_PHYSP	75	2	268.5	2.38667
H3IFD6	Uncharacterized protein n=1 Tax=Strongylocentrotus purpuratus RepID=H3IFD6_STRPU	682	2	538.5	0.526393
D0MGZ3	Outer membrane efflux protein n=2 Tax=Rhodothermus marinus RepID=D0MGZ3_RHOM4	535	2	483.5	0.602492
Q3AR72	VCBS n=1 Tax=Chlorobium chlorochromatii CaD3 RepID=Q3AR72_CHLCH	16311	2	348.5	0.014244
A6FWA0	Phosphonate-binding periplasmic protein n=1 Tax=Roseobacter sp. AzwK-3b RepID=A6FWA0_9RHOB	316	2	373.5	0.787975
Q4JMQ5	Predicted flagellin n=1 Tax=uncultured bacterium BAC17H8 RepID=Q4JMQ5_9BACT	837	2	543.5	0.432895
F2UQC3	Putative uncharacterized protein n=1 Tax=Salpingoeca sp. ATCC 50818 RepID=F2UQC3_SALS5	545	2	365	0.446483
H8MIY5	Putative uncharacterized protein n=1 Tax=Corallococcus coralloides DSM 2259 RepID=H8MIY5_MYXCO	326	2	332	0.678937
Q2MFL4	Putative transcriptional regulator of AraC family n=1 Tax=Streptoalloteichus tenebrarius RepID=Q2MFL4_STRSD	244	2	301	0.822404
E6VZB2	Ribosomal protein S12 methylthiotransferase RimO n=1 Tax=Desulfovibrio aespoeensis Aspo-2 RepID=E6VZB2_DESAO	443	2	471	0.708804
H1YYP0	Putative uncharacterized protein n=1 Tax=Methanoplanus limicola DSM 2279 RepID=H1YYP0_9EURY	455	2	578	0.846886
C9NX72	Probable RTX n=1 Tax=Vibrio coralliilyticus ATCC BAA-450 RepID=C9NX72_9VIBR	3612	2	446	0.0823182
B5DI50	GA25818 n=1 Tax=Drosophila pseudoobscura pseudoobscura RepID=B5DI50_DROPS	145	2	219	1.0069
B6IX70	Elongation factor G 2 n=1 Tax=Rhodospirillum centenum SW RepID=B6IX70_RHOCS	713	2	472.5	0.441795
D0SEL7	Putative uncharacterized protein n=3 Tax=Acinetobacter RepID=D0SEL7_ACIJO	395	2	416	0.70211
G0A453	Putative uncharacterized protein n=1 Tax=Methylomonas methanica MC09 RepID=G0A453_METMM	495	2	525.5	0.707744
H2KR64	Spectrin beta n=1 Tax=Clonorchis sinensis RepID=H2KR64_CLOSI	2058	2	596	0.193068
Q12KZ1	Glucose/galactose transporter n=1 Tax=Shewanella denitrificans OS217 RepID=Q12KZ1_SHEDO	435	2	396	0.606897
A2SHL8	2-isopropylmalate synthase n=1 Tax=Methylibium petroleiphilum PM1 RepID=LEU1_METPP	513	2	505	0.65627
G4DKV2	Exonuclease RNase T and DNA polymerase III n=1 Tax=Thioalkalivibrio thiocyanoxidans ARh 4 RepID=G4DKV2_9GAMM	235	2	406	1.15177
G4DKV8	Polyribonucleotide nucleotidyltransferase n=1 Tax=Thioalkalivibrio thiocyanoxidans ARh 4 RepID=G4DKV8_9GAMM	694	2	506.5	0.486551
C6KVI8	Phenylacetate-CoA oxygenase, PaaG subunit n=1 Tax=uncultured bacterium RepID=C6KVI8_9BACT	341	2	621	1.21408
D0SBD8	Multidrug efflux protein AdeJ n=4 Tax=Acinetobacter RepID=D0SBD8_ACIJO	1059	2	415.5	0.261568
A6CG29	1-deoxy-D-xylulose-5-phosphate synthase n=1 Tax=Planctomyces maris DSM 8797 RepID=A6CG29_9PLAN	637	2	517	0.541078
D3RRY5	Alanyl-tRNA synthetase n=1 Tax=Allochromatium vinosum DSM 180 RepID=D3RRY5_ALLVD	867	2	560	0.430604
D7TQ06	Coatomer subunit gamma n=8 Tax=rosids RepID=D7TQ06_VITVI	887	2	231	0.173619
Q0A748	Septum site-determining protein MinD n=1 Tax=Alkalilimnicola ehrlichii MLHE-1 RepID=Q0A748_ALHEH	269	2	329	0.815366
P94132	Probable electron transfer flavoprotein-ubiquinone oxidoreductase n=39 Tax=Acinetobacter RepID=ETFD_ACIAD	570	2	428.5	0.50117
C8S0L0	HlyA-like protein n=1 Tax=Rhodobacter sp. SW2 RepID=C8S0L0_9RHOB	1033	2	445	0.287189
B1ZZ40	Alanine--tRNA ligase n=1 Tax=Opitutus terrae PB90-1 RepID=SYA_OPITP	937	2	378	0.268943
G4DIB3	Putative uncharacterized protein n=1 Tax=Thioalkalivibrio thiocyanoxidans ARh 4 RepID=G4DIB3_9GAMM	396	2	467	0.786195
F4QB80	Putative uncharacterized protein n=1 Tax=Dictyostelium fasciculatum SH3 RepID=F4QB80_DICFS	331	2	510.5	1.0282

## Sheet: Beseka
Accession	Name	Length	Hits	Mean read length (bp)	Coverage
F3KNG9	Putative uncharacterized protein n=1 Tax=Candidatus Nitrosoarchaeum limnia SFB1 RepID=F3KNG9_9ARCH	1727	72	460.556	6.40031
F9CYL9	Putative PKD domain protein n=1 Tax=Candidatus Nitrosoarchaeum koreensis MY1 RepID=F9CYL9_9ARCH	1646	41	423.732	3.51823
O78446	Photosystem Q(B) protein n=82 Tax=Eukaryota RepID=PSBA_GUITH	360	15	439.933	6.11019
H1EV92	Putative uncharacterized protein n=1 Tax=Candidatus Nitrosopumilus salaria BD31 RepID=H1EV92_9ARCH	1694	15	426.933	1.26013
A9A5U2	Putative uncharacterized protein n=1 Tax=Nitrosopumilus maritimus SCM1 RepID=A9A5U2_NITMS	1708	14	433.429	1.18423
E2DSJ2	Photosystem Q(B) protein n=2 Tax=Chlorophyta RepID=E2DSJ2_9CHLO	354	11	458.909	4.7533
Q9MSC1	Photosystem Q(B) protein n=14 Tax=Dinophyceae RepID=PSBA_HETPY	348	10	355.2	3.4023
G8N016	Putative uncharacterized protein n=1 Tax=Geobacillus thermoleovorans CCB_US3_UF5 RepID=G8N016_GEOTH	292	10	332.3	3.79338
A9A4Y9	Putative uncharacterized protein n=1 Tax=Nitrosopumilus maritimus SCM1 RepID=A9A4Y9_NITMS	1734	10	358.7	0.689542
P83755	Photosystem Q(B) protein n=2340 Tax=root RepID=PSBA_ARATH	353	8	437.375	3.30406
F3L2C1	Flagellar biosynthesis protein fliC n=1 Tax=gamma proteobacterium IMCC3088 RepID=F3L2C1_9GAMM	391	8	329.75	2.24893
A9A4U4	Ammonia monooxygenase/methane monooxygenase, subunit C n=7 Tax=Archaea RepID=A9A4U4_NITMS	190	5	377.2	3.30877
Q3BKI1	Putative uncharacterized protein n=1 Tax=Magnetospirillum gryphiswaldense RepID=Q3BKI1_9PROT	259	5	254	1.63449
F3KKI8	NirK, nitrite reductase multicopper oxidase n=2 Tax=Candidatus Nitrosoarchaeum RepID=F3KKI8_9ARCH	470	4	586.75	1.66454
G8N0X1	Putative uncharacterized protein n=1 Tax=Geobacillus thermoleovorans CCB_US3_UF5 RepID=G8N0X1_GEOTH	101	4	300.5	3.967
F9CYI8	Ferritin Dps family protein n=1 Tax=Candidatus Nitrosoarchaeum koreensis MY1 RepID=F9CYI8_9ARCH	156	4	373.5	3.19231
Q58M54	Phage tail fiber-like protein n=1 Tax=Prochlorococcus phage P-SSM2 RepID=Q58M54_BPPRM	1326	4	600.5	0.603821
A0RUL3	Ammonia monooxygenase subunit B n=1 Tax=Cenarchaeum symbiosum A RepID=A0RUL3_CENSY	191	4	365	2.54799
D5ATP2	GSCFA family protein n=1 Tax=Rhodobacter capsulatus SB 1003 RepID=D5ATP2_RHOCB	358	4	392	1.45996
UPI000223F305	UPI000223F305 related cluster n=1 Tax=unknown RepID=UPI000223F305	253	4	634.75	3.34519
F9CY14	Putative uncharacterized protein n=1 Tax=Candidatus Nitrosoarchaeum koreensis MY1 RepID=F9CY14_9ARCH	110	3	310.333	2.82121
UPI000038E537	hypothetical protein Faci_05715 n=1 Tax=Ferroplasma acidarmanus fer1 RepID=UPI000038E537	131	3	406.667	3.10433
E6DUK6	Putative uncharacterized protein n=1 Tax=Propionibacterium acnes HL053PA2 RepID=E6DUK6_PROAA	113	3	413.667	3.66077
H1EYQ3	Putative uncharacterized protein n=1 Tax=Candidatus Nitrosopumilus salaria BD31 RepID=H1EYQ3_9ARCH	292	3	184	0.630137
C0BJ96	DNA-directed RNA polymerase subunit beta n=1 Tax=Flavobacteria bacterium MS024-2A RepID=C0BJ96_9BACT	1269	3	332	0.261623
C7PUF6	Elongation factor Tu n=7 Tax=Bacteria RepID=C7PUF6_CHIPD	395	3	378.667	0.95865
H1EXG5	4Fe-4S binding domain protein n=2 Tax=Nitrosopumilus RepID=H1EXG5_9ARCH	169	3	335.667	1.98619
Q9BBC1	Photosystem Q(B) protein n=4 Tax=Amphidinium RepID=PSBA_AMPCA	340	3	394	1.15882
UPI000018F629	UPI000018F629 related cluster n=1 Tax=unknown RepID=UPI000018F629	168	3	296.667	1.76587
B5JGC5	TonB-dependent receptor plug domain protein n=1 Tax=Verrucomicrobiae bacterium DG1235 RepID=B5JGC5_9BACT	923	3	511.333	0.553991
Q112H1	TPR repeat n=1 Tax=Trichodesmium erythraeum IMS101 RepID=Q112H1_TRIEI	1421	3	351	0.247009
B0A7G6	Putative uncharacterized protein n=1 Tax=Clostridium bartlettii DSM 16795 RepID=B0A7G6_9FIRM	85	3	294	3.45882
O78427	Photosystem II D2 protein n=8 Tax=Eukaryota RepID=PSBD_GUITH	351	3	385.333	1.09782
E5C3H0	Putative uncharacterized protein (Fragment) n=1 Tax=Fusobacterium gonidiaformans ATCC 25563 RepID=E5C3H0_9FUSO	79	3	248	3.13924
D5GZ88	Conserved protein n=1 Tax=Lactobacillus crispatus ST1 RepID=D5GZ88_LACCS	156	3	268.333	1.72009
F2IJ47	Putative uncharacterized protein n=1 Tax=Fluviicola taffensis DSM 16823 RepID=F2IJ47_FLUTR	122	2	196	1.07104
G2KPE8	Apolipoprotein N-acyltransferase n=1 Tax=Micavibrio aeruginosavorus ARL-13 RepID=G2KPE8_MICAA	525	2	251	0.31873
B9XF02	Putative uncharacterized protein n=1 Tax=Pedosphaera parvula Ellin514 RepID=B9XF02_9BACT	632	2	581	0.612869
P17243	B-phycoerythrin beta chain n=3 Tax=Pyrenomonadales RepID=PHEB_GUITH	177	2	347.5	1.30885
C5F7U7	DNA gyrase subunit A n=15 Tax=Lactobacillus RepID=C5F7U7_LACPA	873	2	325	0.248186
A6EHQ4	50S ribosomal protein L14 n=7 Tax=Bacteroidetes RepID=A6EHQ4_9SPHI	122	2	282	1.54098
B3QTR0	Ion transport protein n=1 Tax=Chloroherpeton thalassium ATCC 35110 RepID=B3QTR0_CHLT3	285	2	607.5	1.42105
E7RU41	Putative uncharacterized protein n=1 Tax=Lautropia mirabilis ATCC 51599 RepID=E7RU41_9BURK	338	2	566	1.11637
F8EEP4	50S ribosomal protein L7/L12 n=1 Tax=Runella slithyformis DSM 19594 RepID=F8EEP4_RUNSL	126	2	424.5	2.24603
O78511	Photosystem II CP47 chlorophyll apoprotein n=9 Tax=Eukaryota RepID=PSBB_GUITH	509	2	477.5	0.625409
O79864	NADH-ubiquinone oxidoreductase chain 4 n=1 Tax=Chlorogonium elongatum RepID=O79864_9CHLO	460	2	416	0.602899
E1VCF1	K03734 thiamine biosynthesis lipoprotein n=1 Tax=Halomonas elongata DSM 2581 RepID=E1VCF1_HALED	372	2	422	0.756272
O78508	Photosystem I P700 chlorophyll a apoprotein A1 n=7 Tax=Cryptophyta RepID=PSAA_GUITH	752	2	326.5	0.28945
E7RU42	Putative uncharacterized protein n=1 Tax=Lautropia mirabilis ATCC 51599 RepID=E7RU42_9BURK	360	2	487	0.901852
D1RBK2	Putative uncharacterized protein n=1 Tax=Parachlamydia acanthamoebae str. Hall's coccus RepID=D1RBK2_9CHLA	175	2	432.5	1.64762
A0RWC7	Fe-S oxidoreductase n=6 Tax=Thaumarchaeota RepID=A0RWC7_CENSY	589	2	282	0.319185
Q9TM69	Photosystem Q(B) protein n=6 Tax=Alexandrium RepID=PSBA_ALETA	347	2	392.5	0.754083
F2I9Y5	50S ribosomal protein L1 n=1 Tax=Fluviicola taffensis DSM 16823 RepID=F2I9Y5_FLUTR	231	2	413	1.19192
B4CU41	UvrD/REP helicase n=1 Tax=Chthoniobacter flavus Ellin428 RepID=B4CU41_9BACT	678	2	285	0.280236
F3KKT3	Putative uncharacterized protein n=1 Tax=Candidatus Nitrosoarchaeum limnia SFB1 RepID=F3KKT3_9ARCH	282	2	495.5	1.17139
UPI000255D72D	hypothetical protein AnHS1_12946 n=1 Tax=Anaerophaga sp. HS1 RepID=UPI000255D72D	50	2	292.5	3.9
E7RZD2	ATP synthase subunit a n=1 Tax=Lautropia mirabilis ATCC 51599 RepID=E7RZD2_9BURK	285	2	431	1.00819
F9CY08	Ammonia monoooxygenase subunit A n=6 Tax=Archaea RepID=F9CY08_9ARCH	141	2	390.5	1.84634
E4T067	Putative uncharacterized protein n=1 Tax=Paludibacter propionicigenes WB4 RepID=E4T067_PALPW	1755	2	428	0.162583
C6Y278	DNA-directed RNA polymerase subunit beta n=3 Tax=Sphingobacteriaceae RepID=C6Y278_PEDHD	1267	2	409	0.215207
Q4VTY8	WbuT n=3 Tax=Enterobacteriaceae RepID=Q4VTY8_SHIBO	278	2	443.5	1.06355
G8R297	3'(2'),5'-bisphosphate nucleotidase n=1 Tax=Owenweeksia hongkongensis DSM 17368 RepID=G8R297_OWEHD	270	2	306.5	0.75679
A9A110	30S ribosomal protein S6e n=1 Tax=Nitrosopumilus maritimus SCM1 RepID=RS6E_NITMS	137	2	316	1.53771
B1ZRS7	Ferredoxin n=1 Tax=Opitutus terrae PB90-1 RepID=B1ZRS7_OPITP	628	2	615.5	0.653397
A4AI13	Lipoprotein n=1 Tax=marine actinobacterium PHSC20C1 RepID=A4AI13_9ACTN	558	2	351	0.419355
H8XNS4	30S ribosomal protein S16 n=1 Tax=Flavobacterium indicum GPTSA100-9 RepID=H8XNS4_9FLAO	184	2	285.5	1.03442
F2LBP3	Phasin-like protein n=1 Tax=Burkholderia gladioli BSR3 RepID=F2LBP3_BURGS	189	2	487.5	1.71958
Q47F17	Formate dehydrogenase (Quinone-dependent) catalytic subunit n=1 Tax=Dechloromonas aromatica RCB RepID=Q47F17_DECAR	820	2	278	0.226016
O57960	Putative uncharacterized protein PH0221 n=1 Tax=Pyrococcus horikoshii OT3 RepID=O57960_PYRHO	235	2	436	1.23688
B9XFM9	50S ribosomal protein L23 n=1 Tax=Pedosphaera parvula Ellin514 RepID=B9XFM9_9BACT	93	2	364	2.60932
H1EU78	Putative uncharacterized protein n=1 Tax=Candidatus Nitrosopumilus salaria BD31 RepID=H1EU78_9ARCH	271	2	340.5	0.837638
G7SQ07	Putative uncharacterized protein n=1 Tax=Blattabacterium sp. (Mastotermes darwiniensis) str. MADAR RepID=G7SQ07_9FLAO	119	2	213	1.19328
C2FT67	30S ribosomal protein S2 n=2 Tax=Sphingobacterium spiritivorum RepID=C2FT67_9SPHI	270	2	243.5	0.601235
E4TRV8	Putative uncharacterized protein n=1 Tax=Marivirga tractuosa DSM 4126 RepID=E4TRV8_MARTH	254	2	378	0.992126
A0RZA3	50S ribosomal protein L37e n=1 Tax=Cenarchaeum symbiosum A RepID=RL37_CENSY	55	2	276	3.34545
H1EVM2	Thermosome, subunit n=4 Tax=Nitrosopumilaceae RepID=H1EVM2_9ARCH	574	2	361.5	0.419861
F3KLN8	Ammonium transporter n=3 Tax=Nitrosopumilaceae RepID=F3KLN8_9ARCH	520	2	351	0.45
E4RX13	Elongation factor Tu n=1 Tax=Leadbetterella byssophila DSM 17132 RepID=E4RX13_LEAB4	395	2	268	0.452321
C9YCY4	Putative RNA-binding protein rbpB n=2 Tax=Curvibacter putative symbiont of Hydra magnipapillata RepID=C9YCY4_9BURK	124	2	390.5	2.09946
A0RU18	Putative uncharacterized protein n=1 Tax=Cenarchaeum symbiosum A RepID=A0RU18_CENSY	372	2	531	0.951613
H1EWG9	Putative nitrite reductase, copper-dependent n=1 Tax=Candidatus Nitrosopumilus salaria BD31 RepID=H1EWG9_9ARCH	464	2	362	0.520115
A3JGH0	Putative uncharacterized protein n=1 Tax=Marinobacter sp. ELB17 RepID=A3JGH0_9ALTE	663	2	317	0.318753
A3XMM6	30S ribosomal protein S1 n=1 Tax=Leeuwenhoekiella blandensis MED217 RepID=A3XMM6_LEEBM	627	2	297.5	0.316321
D2QYK2	Putative uncharacterized protein n=1 Tax=Pirellula staleyi DSM 6068 RepID=D2QYK2_PIRSD	848	2	220.5	0.173349
A2SFX9	Putative uncharacterized protein n=1 Tax=Methylibium petroleiphilum PM1 RepID=A2SFX9_METPP	181	2	355.5	1.30939
C0SGT5	Putative uncharacterized protein n=1 Tax=Paracoccidioides brasiliensis Pb03 RepID=C0SGT5_PARBP	157	2	310.5	1.31847
D8U3F7	Putative uncharacterized protein n=1 Tax=Volvox carteri RepID=D8U3F7_VOLCA	1359	2	311	0.152563
D6CRH0	Benzoyl-CoA oxygenase component B n=1 Tax=Thiomonas sp. 3As RepID=D6CRH0_THIS3	475	2	331.5	0.465263
G8ML94	Outer membrane porin OpcP n=1 Tax=Burkholderia sp. YI23 RepID=G8ML94_9BURK	372	2	300	0.537634
H1Y6W1	TonB-dependent receptor plug n=1 Tax=Mucilaginibacter paludis DSM 18603 RepID=H1Y6W1_9SPHI	1042	2	614.5	0.393154
G7I9S0	Ribosomal protein S10 n=2 Tax=Medicago truncatula RepID=G7I9S0_MEDTR	1152	2	299.5	0.173322
F1TBN0	Aminotransferase class I and II n=1 Tax=Clostridium papyrosolvens DSM 2782 RepID=F1TBN0_9CLOT	388	2	456	0.783505
A3HXH4	Putative uncharacterized protein n=1 Tax=Algoriphagus sp. PR1 RepID=A3HXH4_9BACT	883	2	320	0.241601
